# Supplementary material for: A half-century of changes in migratory landbird numbers along coastal Massachusetts
Source: PLoS One. 2019 Sep 6;14(9):e0222232. doi: 10.1371/journal.pone.0222232 (PMC6731022; doi:10.1371/journal.pone.0222232)
Supplement: S3 Table — NET.HOURS indicates the total number of effort-hours for that season. (CSV) [file pone.0222232.s003.csv]

X.1	Year	Letter	freq	NET.HOURS
2	1970	BHCO	4	8838
4	1970	COYE	120	8838
5	1970	AMGO	19	8838
6	1970	TEWA	1	8838
7	1970	TRFL	28	8838
8	1970	BAOR	35	8838
9	1970	CEDW	4	8838
10	1970	PRAW	4	8838
12	1970	NOCA	1	8838
13	1970	WIWA	40	8838
15	1970	GCKI	1	8838
18	1970	MYWA	1	8838
19	1970	RCKI	7	8838
20	1970	OVEN	10	8838
21	1970	REVI	12	8838
22	1970	GCFL	2	8838
24	1970	AMRE	75	8838
25	1970	MAWA	34	8838
26	1970	BRCR	4	8838
27	1970	WOTH	19	8838
28	1970	LEFL	5	8838
29	1970	BLPW	19	8838
32	1970	CAWA	22	8838
33	1970	YEWA	20	8838
34	1970	EAPH	3	8838
35	1970	HETH	2	8838
36	1970	SCJU	4	8838
37	1970	WTSP	44	8838
38	1970	MOWA	17	8838
39	1970	BLJA	235	8838
40	1970	FISP	2	8838
41	1970	BTBW	5	8838
44	1970	COGR	24	8838
47	1970	BGGN	3	8838
48	1970	GRCA	297	8838
49	1970	VEER	2	8838
50	1970	BAWW	30	8838
51	1970	NAWA	5	8838
52	1970	BCCH	87	8838
53	1970	BHVI	3	8838
54	1970	SWTH	10	8838
56	1970	SWSP	34	8838
58	1970	NOPA	8	8838
59	1970	YBCH	3	8838
60	1970	BRTH	14	8838
62	1970	PUFI	9	8838
64	1970	SOSP	23	8838
66	1970	AMRO	14	8838
67	1970	EAWP	14	8838
68	1970	NOWA	9	8838
69	1970	RWBL	12	8838
70	1970	YBFL	19	8838
74	1970	LISP	4	8838
75	1970	EATO	59	8838
76	1970	YSFL	4	8838
77	1970	BTNW	2	8838
80	1971	WOTH	33	25985.6
82	1971	CEDW	33	25985.6
84	1971	COYE	144	25985.6
85	1971	NOPA	7	25985.6
86	1971	BBWA	3	25985.6
88	1971	BHVI	8	25985.6
90	1971	CARW	1	25985.6
92	1971	BAOR	109	25985.6
94	1971	MOWA	15	25985.6
96	1971	NAWA	7	25985.6
98	1971	SWTH	51	25985.6
101	1971	REVI	27	25985.6
102	1971	EAWP	20	25985.6
104	1971	EATO	112	25985.6
105	1971	MAWA	67	25985.6
106	1971	BRCR	14	25985.6
107	1971	YPWA	11	25985.6
108	1971	DOWO	5	25985.6
112	1971	BCCH	17	25985.6
113	1971	LEFL	14	25985.6
114	1971	OVEN	46	25985.6
115	1971	GCFL	11	25985.6
117	1971	BRTH	29	25985.6
118	1971	AMGO	30	25985.6
119	1971	BHCO	7	25985.6
120	1971	NOCA	6	25985.6
122	1971	GCKI	1	25985.6
123	1971	BTBW	19	25985.6
126	1971	COGR	6	25985.6
128	1971	EAPH	13	25985.6
129	1971	SWSP	62	25985.6
130	1971	PUFI	10	25985.6
131	1971	GRCA	532	25985.6
132	1971	BAWW	75	25985.6
134	1971	LISP	11	25985.6
136	1971	FISP	5	25985.6
138	1971	YBFL	16	25985.6
139	1971	PRAW	6	25985.6
140	1971	BLPW	30	25985.6
141	1971	YEWA	46	25985.6
142	1971	TEWA	3	25985.6
143	1971	MYWA	56	25985.6
144	1971	BTNW	1	25985.6
145	1971	HETH	75	25985.6
146	1971	WTSP	130	25985.6
147	1971	BLJA	126	25985.6
150	1971	SOSP	37	25985.6
153	1971	AMRO	37	25985.6
156	1971	NOWA	47	25985.6
157	1971	RWBL	28	25985.6
159	1971	AMRE	138	25985.6
160	1971	WIWA	50	25985.6
161	1971	BWWA	1	25985.6
163	1971	TRFL	52	25985.6
164	1971	VEER	29	25985.6
166	1971	CAWA	71	25985.6
171	1971	SCJU	3	25985.6
173	1971	YBCH	1	25985.6
174	1971	BGGN	4	25985.6
175	1971	RCKI	40	25985.6
177	1971	YSFL	13	25985.6
179	1972	CARW	1	18336.3
180	1972	SOSP	27	18336.3
181	1972	EAWP	12	18336.3
182	1972	BTBW	5	18336.3
183	1972	SWTH	17	18336.3
185	1972	BHCO	8	18336.3
186	1972	BHVI	1	18336.3
187	1972	MAWA	10	18336.3
189	1972	WOTH	8	18336.3
193	1972	BRCR	19	18336.3
194	1972	NOPA	5	18336.3
195	1972	FISP	7	18336.3
196	1972	AMRO	30	18336.3
197	1972	GCKI	2	18336.3
201	1972	GCFL	6	18336.3
204	1972	BAWW	30	18336.3
205	1972	NOCA	1	18336.3
206	1972	YBFL	10	18336.3
208	1972	DOWO	3	18336.3
210	1972	OVEN	29	18336.3
212	1972	EATO	112	18336.3
213	1972	CEDW	6	18336.3
214	1972	AMGO	18	18336.3
215	1972	SCJU	3	18336.3
216	1972	YPWA	4	18336.3
217	1972	WTSP	180	18336.3
218	1972	BCCH	43	18336.3
219	1972	SWSP	57	18336.3
220	1972	PRAW	4	18336.3
222	1972	REVI	11	18336.3
223	1972	BBWA	1	18336.3
224	1972	PUFI	8	18336.3
225	1972	NAWA	3	18336.3
226	1972	COYE	63	18336.3
228	1972	RWBL	15	18336.3
230	1972	YSFL	31	18336.3
231	1972	LEFL	10	18336.3
232	1972	CAWA	8	18336.3
233	1972	MOWA	12	18336.3
235	1972	BLJA	53	18336.3
236	1972	GRCA	370	18336.3
237	1972	YEWA	13	18336.3
238	1972	RCKI	70	18336.3
240	1972	AMRE	24	18336.3
241	1972	LISP	2	18336.3
242	1972	BGGN	6	18336.3
243	1972	NOWA	14	18336.3
244	1972	COGR	5	18336.3
247	1972	HETH	117	18336.3
248	1972	BRTH	25	18336.3
249	1972	BLPW	14	18336.3
252	1972	EAPH	10	18336.3
254	1972	BAOR	44	18336.3
255	1972	YBCH	1	18336.3
256	1972	VEER	5	18336.3
257	1972	TEWA	1	18336.3
261	1972	MYWA	13	18336.3
262	1972	WIWA	8	18336.3
264	1972	TRFL	26	18336.3
266	1973	BTBW	12	20844
267	1973	SOSP	33	20844
268	1973	EAWP	17	20844
269	1973	SWTH	47	20844
272	1973	YBFL	10	20844
273	1973	RTHU	20	20844
274	1973	WOTH	9	20844
275	1973	MAWA	71	20844
280	1973	BBWA	6	20844
283	1973	AMRE	140	20844
284	1973	YPWA	4	20844
289	1973	NOPA	10	20844
291	1973	PRAW	5	20844
292	1973	BHVI	2	20844
294	1973	SCJU	20	20844
295	1973	VEER	15	20844
297	1973	TEWA	10	20844
298	1973	GCKI	2	20844
299	1973	FISP	4	20844
301	1973	MOWA	16	20844
303	1973	SWSP	34	20844
304	1973	BRTH	20	20844
305	1973	BRCR	4	20844
306	1973	BAWW	88	20844
307	1973	CEDW	21	20844
309	1973	BAOR	46	20844
310	1973	RWBL	52	20844
312	1973	AMGO	18	20844
313	1973	BCCH	11	20844
315	1973	COYE	91	20844
317	1973	OVEN	43	20844
318	1973	EATO	74	20844
320	1973	NAWA	1	20844
321	1973	BHCO	47	20844
322	1973	WTSP	283	20844
323	1973	GRCA	351	20844
324	1973	HETH	21	20844
326	1973	AMRO	21	20844
327	1973	BLPW	54	20844
328	1973	NOWA	27	20844
330	1973	LEFL	1	20844
331	1973	COGR	83	20844
335	1973	PUFI	8	20844
336	1973	BTNW	5	20844
337	1973	BGGN	4	20844
339	1973	LISP	1	20844
340	1973	BLJA	231	20844
341	1973	REVI	38	20844
342	1973	WIWA	45	20844
347	1973	MYWA	14	20844
348	1973	GCFL	4	20844
349	1973	EAPH	2	20844
351	1973	YEWA	26	20844
352	1973	TUTI	1	20844
353	1973	YSFL	7	20844
354	1973	RCKI	46	20844
355	1973	TRFL	38	20844
356	1973	CAWA	54	20844
357	1973	YBCH	1	20844
359	1974	BTBW	18	17526.5
360	1974	SOSP	75	17526.5
361	1974	WOTH	16	17526.5
362	1974	EAWP	8	17526.5
364	1974	SWTH	133	17526.5
366	1974	BHVI	4	17526.5
368	1974	DOWO	1	17526.5
372	1974	MAWA	118	17526.5
374	1974	CEDW	6	17526.5
376	1974	NOCA	2	17526.5
377	1974	MOWA	9	17526.5
378	1974	GCKI	1	17526.5
379	1974	BCCH	14	17526.5
382	1974	BRTH	11	17526.5
383	1974	BHCO	26	17526.5
384	1974	WTSP	190	17526.5
385	1974	YBFL	37	17526.5
388	1974	NOWA	120	17526.5
390	1974	BLPW	48	17526.5
392	1974	CARW	1	17526.5
393	1974	FISP	1	17526.5
394	1974	REVI	27	17526.5
395	1974	TEWA	59	17526.5
396	1974	BRCR	9	17526.5
397	1974	COYE	184	17526.5
398	1974	EAPH	6	17526.5
401	1974	SCJU	8	17526.5
403	1974	BBWA	23	17526.5
404	1974	NOPA	9	17526.5
405	1974	PRAW	1	17526.5
406	1974	EATO	105	17526.5
409	1974	BLJA	59	17526.5
410	1974	NAWA	6	17526.5
413	1974	YSFL	7	17526.5
414	1974	HETH	28	17526.5
416	1974	BAWW	110	17526.5
417	1974	AMGO	27	17526.5
419	1974	AMRO	13	17526.5
422	1974	GCFL	2	17526.5
424	1974	BGGN	3	17526.5
426	1974	YEWA	17	17526.5
427	1974	BAOR	51	17526.5
428	1974	PUFI	7	17526.5
429	1974	LISP	32	17526.5
431	1974	OVEN	58	17526.5
432	1974	RWBL	52	17526.5
434	1974	COGR	68	17526.5
436	1974	RTHU	58	17526.5
437	1974	GRCA	663	17526.5
438	1974	VEER	28	17526.5
439	1974	BWWA	2	17526.5
442	1974	RCKI	43	17526.5
445	1974	LEFL	66	17526.5
446	1974	SWSP	71	17526.5
447	1974	CAWA	84	17526.5
448	1974	BTNW	3	17526.5
450	1974	AMRE	103	17526.5
452	1974	TRFL	28	17526.5
453	1974	WIWA	58	17526.5
454	1974	MYWA	11	17526.5
458	1975	SOSP	40	25510
459	1975	PRAW	2	25510
460	1975	GCKI	5	25510
461	1975	MAWA	51	25510
462	1975	RTHU	8	25510
465	1975	BTBW	14	25510
469	1975	WOTH	21	25510
471	1975	MOWA	46	25510
473	1975	NAWA	5	25510
475	1975	WTSP	180	25510
477	1975	SWTH	64	25510
478	1975	NOWA	31	25510
479	1975	EAWP	10	25510
480	1975	BRCR	17	25510
481	1975	YPWA	10	25510
483	1975	BHVI	2	25510
485	1975	YEWA	21	25510
487	1975	DOWO	2	25510
488	1975	BHCO	8	25510
489	1975	TEWA	1	25510
491	1975	BLJA	114	25510
494	1975	YBFL	13	25510
495	1975	BBWA	1	25510
497	1975	GRCA	638	25510
498	1975	COYE	176	25510
499	1975	COGR	16	25510
501	1975	FISP	7	25510
503	1975	AMRO	30	25510
504	1975	BRTH	24	25510
505	1975	BCCH	5	25510
507	1975	REVI	16	25510
510	1975	BGGN	8	25510
513	1975	PUFI	9	25510
515	1975	AMRE	108	25510
517	1975	EATO	67	25510
519	1975	YSFL	6	25510
520	1975	BAWW	66	25510
521	1975	CEDW	10	25510
523	1975	SCJU	3	25510
524	1975	LEFL	8	25510
526	1975	AMGO	31	25510
527	1975	RCKI	86	25510
528	1975	LISP	4	25510
529	1975	OVEN	48	25510
530	1975	GCFL	7	25510
532	1975	VEER	17	25510
533	1975	BAOR	56	25510
535	1975	BTNW	9	25510
536	1975	HETH	29	25510
538	1975	RWBL	20	25510
539	1975	NOCA	5	25510
540	1975	SWSP	22	25510
542	1975	MYWA	8	25510
543	1975	CAWA	92	25510
544	1975	BLPW	83	25510
545	1975	WIWA	18	25510
546	1975	EAPH	8	25510
548	1975	TRFL	45	25510
549	1975	NOPA	7	25510
550	1975	YBCH	1	25510
551	1975	TUTI	1	25510
554	1976	BTBW	20	22912.4
558	1976	NOWA	72	22912.4
559	1976	MAWA	53	22912.4
560	1976	SOSP	19	22912.4
561	1976	BLJA	234	22912.4
562	1976	MOWA	5	22912.4
563	1976	BRTH	16	22912.4
564	1976	PRAW	7	22912.4
568	1976	BRCR	3	22912.4
569	1976	YPWA	2	22912.4
570	1976	WOTH	15	22912.4
571	1976	AMRO	38	22912.4
572	1976	BBWA	5	22912.4
574	1976	BHVI	3	22912.4
575	1976	SWTH	72	22912.4
578	1976	BHCO	22	22912.4
579	1976	NOCA	7	22912.4
580	1976	CEDW	2	22912.4
582	1976	GRCA	628	22912.4
583	1976	FISP	3	22912.4
584	1976	WTSP	145	22912.4
586	1976	LISP	13	22912.4
587	1976	COGR	22	22912.4
589	1976	VEER	18	22912.4
591	1976	CAWA	52	22912.4
592	1976	BAWW	82	22912.4
593	1976	PUFI	5	22912.4
596	1976	BGGN	4	22912.4
597	1976	REVI	16	22912.4
598	1976	DOWO	1	22912.4
599	1976	GCKI	2	22912.4
601	1976	EAPH	4	22912.4
602	1976	BTNW	1	22912.4
603	1976	YSFL	15	22912.4
604	1976	OVEN	73	22912.4
605	1976	SWSP	50	22912.4
606	1976	TEWA	9	22912.4
608	1976	MYWA	6	22912.4
610	1976	RTHU	36	22912.4
611	1976	BWWA	2	22912.4
612	1976	NAWA	6	22912.4
613	1976	YEWA	14	22912.4
614	1976	RCKI	22	22912.4
615	1976	GCFL	2	22912.4
617	1976	BAOR	50	22912.4
619	1976	LEFL	9	22912.4
620	1976	COYE	156	22912.4
621	1976	WIWA	25	22912.4
622	1976	TRFL	13	22912.4
624	1976	AMRE	142	22912.4
625	1976	BCCH	92	22912.4
626	1976	HETH	26	22912.4
627	1976	EATO	59	22912.4
628	1976	RWBL	25	22912.4
629	1976	EAWP	3	22912.4
631	1976	YBCH	1	22912.4
633	1976	SCJU	14	22912.4
636	1976	NOPA	14	22912.4
637	1976	AMGO	22	22912.4
641	1976	BLPW	50	22912.4
642	1977	BTBW	22	28373.8
647	1977	NOWA	79	28373.8
648	1977	BRTH	14	28373.8
649	1977	BBWA	6	28373.8
654	1977	BRCR	4	28373.8
656	1977	MAWA	69	28373.8
657	1977	VEER	47	28373.8
658	1977	BAWW	125	28373.8
660	1977	EAPH	1	28373.8
661	1977	NOCA	5	28373.8
662	1977	BLPW	121	28373.8
664	1977	BHVI	5	28373.8
665	1977	FISP	4	28373.8
667	1977	SWTH	55	28373.8
670	1977	BCCH	17	28373.8
671	1977	CAWA	103	28373.8
672	1977	SOSP	24	28373.8
673	1977	TEWA	8	28373.8
674	1977	GRCA	676	28373.8
675	1977	AMRO	52	28373.8
676	1977	BLJA	26	28373.8
678	1977	CARW	1	28373.8
679	1977	BAOR	50	28373.8
681	1977	RTHU	22	28373.8
682	1977	AMRE	134	28373.8
684	1977	BTNW	12	28373.8
685	1977	NOPA	21	28373.8
687	1977	GCFL	12	28373.8
688	1977	YSFL	9	28373.8
691	1977	LISP	12	28373.8
694	1977	WOTH	32	28373.8
695	1977	PRAW	7	28373.8
696	1977	EAWP	9	28373.8
698	1977	LEFL	18	28373.8
699	1977	OVEN	90	28373.8
700	1977	SCJU	5	28373.8
702	1977	PUFI	6	28373.8
705	1977	WTSP	405	28373.8
706	1977	YBFL	16	28373.8
707	1977	YEWA	41	28373.8
708	1977	NAWA	18	28373.8
709	1977	MOWA	9	28373.8
710	1977	YPWA	2	28373.8
713	1977	WIWA	28	28373.8
714	1977	MYWA	32	28373.8
715	1977	BHCO	8	28373.8
716	1977	COYE	191	28373.8
717	1977	BWWA	3	28373.8
718	1977	SWSP	55	28373.8
719	1977	COGR	28	28373.8
722	1977	AMGO	57	28373.8
724	1977	BGGN	7	28373.8
725	1977	YBCH	5	28373.8
726	1977	RCKI	31	28373.8
728	1977	HETH	20	28373.8
729	1977	REVI	21	28373.8
730	1977	EATO	79	28373.8
734	1977	TRFL	42	28373.8
735	1977	RWBL	31	28373.8
736	1978	VEER	5	22070.9
740	1978	NOWA	32	22070.9
742	1978	CEDW	12	22070.9
743	1978	SOSP	14	22070.9
745	1978	EAPH	4	22070.9
746	1978	BTBW	5	22070.9
747	1978	BRTH	9	22070.9
749	1978	BLPW	22	22070.9
750	1978	FISP	1	22070.9
752	1978	BRCR	5	22070.9
753	1978	EAWP	4	22070.9
755	1978	HETH	19	22070.9
756	1978	BAWW	55	22070.9
758	1978	BHVI	4	22070.9
759	1978	WTSP	174	22070.9
761	1978	CARW	1	22070.9
763	1978	PRAW	4	22070.9
764	1978	CAWA	23	22070.9
765	1978	LEFL	6	22070.9
767	1978	OVEN	22	22070.9
768	1978	WIWA	8	22070.9
770	1978	BLJA	100	22070.9
772	1978	YSFL	11	22070.9
773	1978	MAWA	32	22070.9
775	1978	YEWA	25	22070.9
777	1978	AMRE	75	22070.9
778	1978	COGR	28	22070.9
779	1978	BTNW	2	22070.9
780	1978	RCKI	17	22070.9
781	1978	RWBL	15	22070.9
782	1978	GRCA	437	22070.9
785	1978	BHCO	8	22070.9
787	1978	YBFL	5	22070.9
788	1978	AMGO	13	22070.9
790	1978	SWTH	16	22070.9
791	1978	NOPA	4	22070.9
792	1978	YBCH	4	22070.9
795	1978	MYWA	19	22070.9
796	1978	AMRO	37	22070.9
797	1978	SCJU	8	22070.9
798	1978	NOCA	6	22070.9
799	1978	TEWA	2	22070.9
800	1978	BAOR	20	22070.9
804	1978	MOWA	3	22070.9
805	1978	WOTH	6	22070.9
809	1978	GCFL	4	22070.9
810	1978	COYE	103	22070.9
812	1978	EATO	54	22070.9
813	1978	SWSP	15	22070.9
814	1978	PUFI	1	22070.9
816	1978	RTHU	21	22070.9
817	1978	YPWA	2	22070.9
818	1978	TRFL	39	22070.9
819	1978	BCCH	21	22070.9
822	1978	BGGN	1	22070.9
825	1978	REVI	13	22070.9
827	1979	LEFL	3	19951
828	1979	BTNW	2	19951
833	1979	VEER	11	19951
834	1979	SWTH	23	19951
836	1979	COGR	70	19951
840	1979	MAWA	37	19951
841	1979	NOWA	30	19951
842	1979	YEWA	14	19951
843	1979	BTBW	8	19951
845	1979	SOSP	6	19951
847	1979	CAWA	22	19951
848	1979	NOPA	9	19951
849	1979	CEDW	1	19951
850	1979	BAWW	54	19951
851	1979	BAOR	18	19951
854	1979	BRTH	18	19951
855	1979	BHVI	8	19951
856	1979	BLJA	161	19951
857	1979	BRCR	1	19951
859	1979	EAPH	1	19951
860	1979	WOTH	6	19951
861	1979	RTHU	26	19951
863	1979	OVEN	16	19951
864	1979	RWBL	36	19951
865	1979	BHCO	11	19951
866	1979	BLPW	42	19951
867	1979	PUFI	5	19951
868	1979	SWSP	12	19951
869	1979	YBFL	7	19951
870	1979	CARW	1	19951
871	1979	YPWA	2	19951
874	1979	TUTI	1	19951
875	1979	PRAW	6	19951
877	1979	WIWA	17	19951
878	1979	HETH	17	19951
879	1979	LISP	4	19951
880	1979	SCJU	3	19951
881	1979	AMRO	33	19951
883	1979	AMGO	15	19951
885	1979	FISP	4	19951
886	1979	EAWP	2	19951
887	1979	BCCH	8	19951
890	1979	RCKI	13	19951
891	1979	GCFL	11	19951
892	1979	WTSP	149	19951
893	1979	YSFL	9	19951
894	1979	TRFL	19	19951
896	1979	MOWA	7	19951
898	1979	NOCA	9	19951
899	1979	NAWA	2	19951
900	1979	BGGN	11	19951
901	1979	GRCA	492	19951
903	1979	AMRE	61	19951
904	1979	BWWA	1	19951
906	1979	MYWA	31	19951
907	1979	COYE	104	19951
908	1979	DOWO	1	19951
910	1979	REVI	5	19951
911	1979	EATO	36	19951
914	1980	SWTH	59	28085.7
916	1980	LEFL	17	28085.7
917	1980	EAPH	2	28085.7
918	1980	BAWW	90	28085.7
919	1980	VEER	43	28085.7
921	1980	BAOR	33	28085.7
923	1980	LISP	26	28085.7
925	1980	FISP	2	28085.7
928	1980	NOPA	10	28085.7
929	1980	DOWO	2	28085.7
931	1980	SOSP	17	28085.7
935	1980	BRTH	18	28085.7
936	1980	NOWA	77	28085.7
937	1980	WTSP	143	28085.7
938	1980	TRFL	57	28085.7
939	1980	BLJA	199	28085.7
940	1980	RTHU	44	28085.7
941	1980	EAWP	10	28085.7
942	1980	COGR	27	28085.7
944	1980	CAWA	44	28085.7
946	1980	BGGN	16	28085.7
947	1980	AMRO	40	28085.7
948	1980	BLPW	40	28085.7
949	1980	YSFL	6	28085.7
952	1980	BTBW	13	28085.7
955	1980	BCCH	16	28085.7
956	1980	BHVI	3	28085.7
957	1980	RCKI	35	28085.7
958	1980	WIWA	33	28085.7
959	1980	CEDW	10	28085.7
960	1980	RWBL	45	28085.7
961	1980	BHCO	12	28085.7
962	1980	BBWA	5	28085.7
964	1980	TEWA	2	28085.7
965	1980	YPWA	6	28085.7
966	1980	BRCR	13	28085.7
967	1980	MAWA	94	28085.7
969	1980	BTNW	5	28085.7
971	1980	MOWA	30	28085.7
972	1980	GCFL	21	28085.7
974	1980	NOCA	12	28085.7
975	1980	GRCA	589	28085.7
976	1980	BWWA	1	28085.7
977	1980	PUFI	3	28085.7
978	1980	YEWA	43	28085.7
980	1980	WOTH	21	28085.7
981	1980	AMRE	106	28085.7
984	1980	HETH	19	28085.7
986	1980	SCJU	4	28085.7
987	1980	COYE	141	28085.7
988	1980	CARW	1	28085.7
991	1980	EATO	42	28085.7
994	1980	OVEN	55	28085.7
997	1980	SWSP	26	28085.7
999	1980	PRAW	6	28085.7
1000	1980	YBFL	30	28085.7
1002	1980	REVI	17	28085.7
1003	1980	AMGO	26	28085.7
1005	1980	MYWA	13	28085.7
1006	1981	CEDW	13	21970.4
1009	1981	NOPA	4	21970.4
1011	1981	LEFL	6	21970.4
1012	1981	BCCH	350	21970.4
1016	1981	VEER	29	21970.4
1017	1981	BAOR	31	21970.4
1018	1981	DOWO	2	21970.4
1019	1981	NOWA	66	21970.4
1020	1981	BLPW	25	21970.4
1023	1981	COGR	32	21970.4
1024	1981	WOTH	24	21970.4
1025	1981	MAWA	61	21970.4
1026	1981	SWTH	92	21970.4
1029	1981	YSFL	8	21970.4
1031	1981	NOCA	9	21970.4
1033	1981	BRCR	4	21970.4
1034	1981	FISP	2	21970.4
1035	1981	BLJA	127	21970.4
1036	1981	SOSP	6	21970.4
1037	1981	YPWA	7	21970.4
1039	1981	TRFL	44	21970.4
1040	1981	CAWA	104	21970.4
1042	1981	SWSP	22	21970.4
1043	1981	BRTH	14	21970.4
1045	1981	CARW	3	21970.4
1046	1981	YEWA	25	21970.4
1047	1981	LISP	14	21970.4
1048	1981	BTBW	16	21970.4
1049	1981	RTHU	27	21970.4
1051	1981	BHVI	2	21970.4
1052	1981	MOWA	14	21970.4
1053	1981	EAPH	7	21970.4
1054	1981	BAWW	69	21970.4
1055	1981	RWBL	22	21970.4
1057	1981	BBWA	3	21970.4
1058	1981	WTSP	178	21970.4
1061	1981	AMRE	87	21970.4
1062	1981	TUTI	4	21970.4
1063	1981	EAWP	12	21970.4
1065	1981	GRCA	576	21970.4
1067	1981	BTNW	1	21970.4
1069	1981	NAWA	1	21970.4
1070	1981	BHCO	8	21970.4
1071	1981	REVI	15	21970.4
1078	1981	GCFL	8	21970.4
1079	1981	GCKI	1	21970.4
1081	1981	PRAW	4	21970.4
1083	1981	WIWA	39	21970.4
1085	1981	COYE	161	21970.4
1086	1981	BWWA	1	21970.4
1087	1981	YBCH	3	21970.4
1090	1981	YBFL	11	21970.4
1091	1981	RCKI	25	21970.4
1092	1981	AMGO	22	21970.4
1093	1981	TEWA	2	21970.4
1094	1981	SCJU	6	21970.4
1095	1981	BGGN	10	21970.4
1096	1981	EATO	37	21970.4
1097	1981	HETH	18	21970.4
1098	1981	AMRO	33	21970.4
1100	1981	OVEN	66	21970.4
1101	1981	MYWA	11	21970.4
1103	1982	BCCH	99	19564
1105	1982	NOPA	4	19564
1106	1982	RTHU	22	19564
1108	1982	TRFL	30	19564
1109	1982	PRAW	8	19564
1110	1982	VEER	37	19564
1111	1982	WOTH	8	19564
1113	1982	BAOR	35	19564
1115	1982	AMRE	101	19564
1116	1982	BLJA	181	19564
1117	1982	SOSP	12	19564
1118	1982	COGR	50	19564
1119	1982	CAWA	74	19564
1120	1982	BLPW	19	19564
1122	1982	GRCA	419	19564
1123	1982	DOWO	3	19564
1125	1982	TUTI	28	19564
1126	1982	LISP	5	19564
1127	1982	EAWP	3	19564
1128	1982	LEFL	6	19564
1129	1982	MOWA	14	19564
1130	1982	SWTH	86	19564
1133	1982	NOWA	32	19564
1136	1982	BTBW	6	19564
1137	1982	CARW	2	19564
1140	1982	BAWW	43	19564
1141	1982	YBFL	9	19564
1142	1982	MAWA	71	19564
1146	1982	BRTH	19	19564
1148	1982	YSFL	6	19564
1149	1982	WTSP	124	19564
1152	1982	FISP	4	19564
1154	1982	BRCR	2	19564
1155	1982	WIWA	29	19564
1156	1982	COYE	95	19564
1157	1982	REVI	17	19564
1158	1982	CEDW	13	19564
1159	1982	AMRO	61	19564
1160	1982	YEWA	15	19564
1161	1982	HETH	11	19564
1162	1982	SWSP	13	19564
1164	1982	EATO	45	19564
1165	1982	RWBL	27	19564
1169	1982	AMGO	17	19564
1170	1982	SCJU	1	19564
1171	1982	BHVI	2	19564
1173	1982	BHCO	8	19564
1174	1982	NAWA	2	19564
1175	1982	GCFL	1	19564
1177	1982	MYWA	4	19564
1178	1982	OVEN	23	19564
1179	1982	PUFI	1	19564
1180	1982	BTNW	4	19564
1183	1982	RCKI	15	19564
1185	1982	NOCA	14	19564
1186	1982	BGGN	17	19564
1187	1982	TEWA	2	19564
1188	1983	VEER	44	18441
1189	1983	CAWA	43	18441
1190	1983	BCCH	12	18441
1192	1983	PRAW	4	18441
1193	1983	TRFL	27	18441
1194	1983	MOWA	20	18441
1196	1983	SOSP	18	18441
1199	1983	EAWP	10	18441
1200	1983	NOWA	32	18441
1202	1983	SWTH	84	18441
1203	1983	NOPA	10	18441
1204	1983	LEFL	12	18441
1206	1983	YPWA	19	18441
1207	1983	DOWO	3	18441
1208	1983	WOTH	9	18441
1209	1983	BTBW	3	18441
1213	1983	COGR	23	18441
1216	1983	CEDW	4	18441
1217	1983	BRTH	7	18441
1218	1983	YBFL	14	18441
1219	1983	MAWA	122	18441
1221	1983	YSFL	5	18441
1222	1983	BAOR	32	18441
1223	1983	BAWW	81	18441
1224	1983	LISP	15	18441
1225	1983	BRCR	4	18441
1226	1983	BGGN	7	18441
1227	1983	BLJA	71	18441
1228	1983	MYWA	4	18441
1229	1983	RTHU	31	18441
1231	1983	BHVI	2	18441
1232	1983	GRCA	351	18441
1233	1983	COYE	98	18441
1234	1983	REVI	7	18441
1235	1983	BLPW	42	18441
1236	1983	PUFI	1	18441
1238	1983	SWSP	11	18441
1239	1983	TEWA	13	18441
1240	1983	SCJU	11	18441
1241	1983	EAPH	3	18441
1243	1983	AMRE	48	18441
1245	1983	CARW	1	18441
1246	1983	TUTI	6	18441
1247	1983	BHCO	6	18441
1249	1983	RWBL	9	18441
1250	1983	BTNW	4	18441
1251	1983	NOCA	7	18441
1255	1983	OVEN	26	18441
1256	1983	WIWA	35	18441
1257	1983	RCKI	36	18441
1258	1983	BBWA	3	18441
1260	1983	GCKI	6	18441
1261	1983	HETH	32	18441
1262	1983	NAWA	10	18441
1263	1983	YEWA	18	18441
1264	1983	AMGO	14	18441
1265	1983	WTSP	76	18441
1266	1983	AMRO	31	18441
1267	1983	GCFL	11	18441
1268	1983	EATO	21	18441
1273	1983	BWWA	3	18441
1276	1984	CAWA	38	20482.2
1278	1984	YPWA	1	20482.2
1279	1984	LEFL	8	20482.2
1280	1984	BRCR	10	20482.2
1281	1984	SWSP	41	20482.2
1283	1984	TRFL	36	20482.2
1284	1984	COGR	71	20482.2
1285	1984	TUTI	6	20482.2
1286	1984	MOWA	19	20482.2
1288	1984	BAWW	103	20482.2
1289	1984	DOWO	4	20482.2
1291	1984	NOPA	3	20482.2
1292	1984	SWTH	33	20482.2
1294	1984	BTBW	6	20482.2
1295	1984	PRAW	8	20482.2
1297	1984	WOTH	16	20482.2
1299	1984	GCKI	6	20482.2
1300	1984	CARW	1	20482.2
1303	1984	YBFL	8	20482.2
1304	1984	BLJA	174	20482.2
1305	1984	PUFI	1	20482.2
1306	1984	VEER	19	20482.2
1307	1984	BAOR	26	20482.2
1308	1984	YEWA	31	20482.2
1311	1984	SOSP	28	20482.2
1313	1984	LISP	5	20482.2
1314	1984	MAWA	51	20482.2
1315	1984	BRTH	13	20482.2
1316	1984	CEDW	6	20482.2
1318	1984	NAWA	2	20482.2
1321	1984	HETH	11	20482.2
1323	1984	BHVI	5	20482.2
1324	1984	REVI	6	20482.2
1328	1984	BGGN	4	20482.2
1329	1984	EATO	18	20482.2
1330	1984	AMGO	26	20482.2
1332	1984	SCJU	6	20482.2
1333	1984	NOCA	14	20482.2
1334	1984	RWBL	24	20482.2
1336	1984	BLPW	21	20482.2
1337	1984	YSFL	6	20482.2
1339	1984	NOWA	36	20482.2
1340	1984	WIWA	34	20482.2
1341	1984	YBCH	2	20482.2
1342	1984	BHCO	14	20482.2
1343	1984	OVEN	21	20482.2
1344	1984	MYWA	6	20482.2
1345	1984	AMRO	44	20482.2
1346	1984	GRCA	538	20482.2
1348	1984	BCCH	59	20482.2
1351	1984	RCKI	21	20482.2
1352	1984	WTSP	153	20482.2
1354	1984	AMRE	60	20482.2
1355	1984	TEWA	1	20482.2
1356	1984	BBWA	1	20482.2
1357	1984	COYE	136	20482.2
1361	1984	GCFL	12	20482.2
1362	1984	RTHU	17	20482.2
1364	1984	BTNW	2	20482.2
1365	1984	EAWP	7	20482.2
1368	1985	NOPA	4	18991.6
1369	1985	WOTH	19	18991.6
1370	1985	BLJA	47	18991.6
1371	1985	BRCR	15	18991.6
1374	1985	CAWA	37	18991.6
1375	1985	SOSP	41	18991.6
1376	1985	MOWA	15	18991.6
1377	1985	VEER	10	18991.6
1378	1985	YPWA	8	18991.6
1380	1985	SWTH	35	18991.6
1381	1985	COGR	33	18991.6
1382	1985	MAWA	61	18991.6
1383	1985	LEFL	7	18991.6
1386	1985	YEWA	18	18991.6
1388	1985	TUTI	3	18991.6
1389	1985	SWSP	95	18991.6
1391	1985	TRFL	20	18991.6
1392	1985	BRTH	9	18991.6
1396	1985	GCKI	3	18991.6
1397	1985	BLPW	15	18991.6
1399	1985	PUFI	5	18991.6
1400	1985	CARW	4	18991.6
1401	1985	PRAW	2	18991.6
1402	1985	YBFL	6	18991.6
1405	1985	LISP	17	18991.6
1406	1985	BAWW	65	18991.6
1407	1985	NOWA	34	18991.6
1409	1985	NOCA	8	18991.6
1413	1985	RWBL	13	18991.6
1415	1985	BHVI	7	18991.6
1416	1985	AMRO	32	18991.6
1417	1985	BAOR	19	18991.6
1419	1985	GRCA	517	18991.6
1421	1985	RCKI	127	18991.6
1422	1985	EATO	35	18991.6
1423	1985	HETH	76	18991.6
1424	1985	AMGO	16	18991.6
1425	1985	BHCO	8	18991.6
1426	1985	CEDW	13	18991.6
1427	1985	REVI	8	18991.6
1428	1985	SCJU	28	18991.6
1430	1985	YSFL	12	18991.6
1432	1985	BTNW	2	18991.6
1433	1985	BGGN	4	18991.6
1434	1985	MYWA	32	18991.6
1437	1985	OVEN	35	18991.6
1438	1985	GCFL	17	18991.6
1439	1985	EAPH	6	18991.6
1440	1985	TEWA	2	18991.6
1442	1985	NAWA	4	18991.6
1444	1985	WTSP	392	18991.6
1445	1985	COYE	118	18991.6
1446	1985	AMRE	100	18991.6
1448	1985	EAWP	8	18991.6
1449	1985	BWWA	1	18991.6
1450	1985	BBWA	1	18991.6
1454	1985	BCCH	10	18991.6
1456	1985	RTHU	21	18991.6
1457	1985	BTBW	8	18991.6
1458	1985	WIWA	9	18991.6
1461	1986	WOTH	5	17337.1
1462	1986	VEER	9	17337.1
1463	1986	COGR	24	17337.1
1464	1986	SOSP	13	17337.1
1466	1986	NOPA	5	17337.1
1467	1986	LEFL	5	17337.1
1468	1986	BAWW	14	17337.1
1469	1986	YBFL	12	17337.1
1471	1986	TRFL	18	17337.1
1472	1986	DOWO	2	17337.1
1474	1986	YEWA	23	17337.1
1475	1986	TUTI	2	17337.1
1476	1986	MOWA	22	17337.1
1477	1986	YPWA	16	17337.1
1479	1986	PRAW	3	17337.1
1480	1986	NOCA	12	17337.1
1481	1986	MAWA	55	17337.1
1482	1986	REVI	10	17337.1
1483	1986	BBWA	1	17337.1
1484	1986	BHCO	6	17337.1
1485	1986	CAWA	59	17337.1
1486	1986	EAWP	8	17337.1
1488	1986	YSFL	5	17337.1
1489	1986	RWBL	15	17337.1
1490	1986	BLJA	23	17337.1
1491	1986	AMRO	18	17337.1
1494	1986	RTHU	7	17337.1
1495	1986	LISP	4	17337.1
1497	1986	MYWA	15	17337.1
1498	1986	NOWA	36	17337.1
1499	1986	SWTH	30	17337.1
1500	1986	BAOR	19	17337.1
1501	1986	GRCA	287	17337.1
1504	1986	HETH	12	17337.1
1505	1986	SWSP	4	17337.1
1506	1986	BCCH	45	17337.1
1508	1986	GCKI	1	17337.1
1509	1986	BGGN	5	17337.1
1510	1986	RCKI	24	17337.1
1511	1986	GCFL	5	17337.1
1512	1986	CARW	1	17337.1
1513	1986	AMGO	14	17337.1
1515	1986	AMRE	107	17337.1
1517	1986	WIWA	20	17337.1
1518	1986	PUFI	2	17337.1
1519	1986	EATO	23	17337.1
1520	1986	OVEN	13	17337.1
1521	1986	BLPW	23	17337.1
1523	1986	NAWA	1	17337.1
1525	1986	EAPH	1	17337.1
1530	1986	COYE	109	17337.1
1532	1986	CEDW	25	17337.1
1533	1986	BWWA	1	17337.1
1534	1986	BRTH	4	17337.1
1536	1986	TEWA	1	17337.1
1538	1986	BRCR	1	17337.1
1539	1986	BTNW	1	17337.1
1541	1986	BTBW	5	17337.1
1542	1986	WTSP	86	17337.1
1544	1987	NOPA	3	27398.9
1545	1987	SWTH	25	27398.9
1546	1987	CAWA	34	27398.9
1548	1987	COGR	38	27398.9
1549	1987	DOWO	3	27398.9
1550	1987	NOCA	9	27398.9
1551	1987	LEFL	7	27398.9
1552	1987	BLJA	62	27398.9
1554	1987	YBFL	6	27398.9
1556	1987	TRFL	38	27398.9
1557	1987	TUTI	4	27398.9
1559	1987	BHVI	1	27398.9
1560	1987	MOWA	7	27398.9
1561	1987	CARW	8	27398.9
1562	1987	MAWA	66	27398.9
1563	1987	AMGO	8	27398.9
1565	1987	YEWA	26	27398.9
1566	1987	EATO	21	27398.9
1567	1987	BCCH	11	27398.9
1569	1987	SCJU	9	27398.9
1571	1987	YSFL	7	27398.9
1572	1987	WOTH	11	27398.9
1575	1987	GRCA	416	27398.9
1577	1987	BBWA	2	27398.9
1578	1987	BGGN	1	27398.9
1579	1987	EAWP	5	27398.9
1581	1987	GCKI	19	27398.9
1582	1987	NOWA	38	27398.9
1583	1987	BAWW	29	27398.9
1585	1987	NAWA	1	27398.9
1587	1987	SWSP	16	27398.9
1588	1987	REVI	5	27398.9
1591	1987	RWBL	32	27398.9
1593	1987	LISP	5	27398.9
1595	1987	BTNW	2	27398.9
1596	1987	BAOR	15	27398.9
1597	1987	AMRO	33	27398.9
1598	1987	BTBW	7	27398.9
1599	1987	MYWA	26	27398.9
1600	1987	EAPH	1	27398.9
1601	1987	AMRE	127	27398.9
1603	1987	SOSP	12	27398.9
1604	1987	BHCO	1	27398.9
1605	1987	CEDW	9	27398.9
1606	1987	RCKI	39	27398.9
1607	1987	WIWA	17	27398.9
1609	1987	PUFI	4	27398.9
1611	1987	BLPW	19	27398.9
1613	1987	RTHU	8	27398.9
1614	1987	PRAW	2	27398.9
1616	1987	BRCR	7	27398.9
1617	1987	YPWA	11	27398.9
1618	1987	OVEN	23	27398.9
1619	1987	HETH	22	27398.9
1621	1987	TEWA	1	27398.9
1622	1987	VEER	10	27398.9
1623	1987	GCFL	8	27398.9
1624	1987	BRTH	7	27398.9
1625	1987	COYE	98	27398.9
1626	1987	WTSP	141	27398.9
1627	1988	NOPA	1	19095
1628	1988	AMGO	12	19095
1629	1988	YBFL	11	19095
1632	1988	TRFL	42	19095
1633	1988	SWTH	19	19095
1634	1988	YEWA	42	19095
1636	1988	BHVI	1	19095
1638	1988	BLJA	101	19095
1641	1988	BLPW	19	19095
1642	1988	BHCO	9	19095
1643	1988	TUTI	9	19095
1644	1988	EATO	23	19095
1646	1988	FISP	2	19095
1647	1988	NOCA	10	19095
1648	1988	COGR	33	19095
1650	1988	SCJU	3	19095
1651	1988	NOWA	17	19095
1652	1988	YPWA	17	19095
1653	1988	LEFL	4	19095
1654	1988	CEDW	15	19095
1656	1988	YSFL	8	19095
1659	1988	AMRO	14	19095
1660	1988	BGGN	8	19095
1661	1988	EAWP	4	19095
1662	1988	WOTH	6	19095
1664	1988	BAOR	20	19095
1666	1988	BAWW	39	19095
1667	1988	GRCA	303	19095
1669	1988	WIWA	14	19095
1671	1988	REVI	5	19095
1672	1988	NAWA	1	19095
1673	1988	BBWA	2	19095
1674	1988	RTHU	16	19095
1676	1988	CAWA	29	19095
1677	1988	VEER	9	19095
1678	1988	BRCR	2	19095
1679	1988	BRTH	8	19095
1680	1988	SWSP	7	19095
1681	1988	GCKI	6	19095
1685	1988	BCCH	4	19095
1686	1988	MYWA	14	19095
1687	1988	PRAW	4	19095
1688	1988	AMRE	64	19095
1689	1988	HETH	16	19095
1690	1988	CARW	9	19095
1691	1988	BTNW	4	19095
1692	1988	DOWO	3	19095
1693	1988	MAWA	42	19095
1694	1988	GCFL	8	19095
1696	1988	LISP	2	19095
1697	1988	RCKI	31	19095
1698	1988	WTSP	120	19095
1699	1988	SOSP	12	19095
1702	1988	RWBL	13	19095
1703	1988	OVEN	14	19095
1704	1988	COYE	67	19095
1707	1988	MOWA	19	19095
1708	1989	NOPA	5	26452
1709	1989	AMGO	24	26452
1712	1989	YBFL	8	26452
1714	1989	EATO	36	26452
1715	1989	NOCA	17	26452
1717	1989	REVI	11	26452
1719	1989	YPWA	35	26452
1721	1989	CEDW	14	26452
1722	1989	SWSP	42	26452
1724	1989	FISP	3	26452
1726	1989	AMRO	30	26452
1727	1989	BHVI	10	26452
1728	1989	BLPW	17	26452
1729	1989	TUTI	3	26452
1731	1989	VEER	10	26452
1732	1989	LEFL	9	26452
1733	1989	NOWA	48	26452
1735	1989	GCKI	14	26452
1736	1989	LISP	7	26452
1737	1989	YSFL	14	26452
1738	1989	GRCA	487	26452
1740	1989	BAOR	37	26452
1741	1989	BHCO	5	26452
1743	1989	CARW	3	26452
1744	1989	CAWA	31	26452
1746	1989	BLJA	44	26452
1747	1989	WOTH	3	26452
1748	1989	OVEN	26	26452
1749	1989	PUFI	1	26452
1750	1989	EAPH	14	26452
1752	1989	SCJU	21	26452
1753	1989	HETH	244	26452
1756	1989	YEWA	15	26452
1758	1989	COGR	38	26452
1759	1989	TRFL	73	26452
1760	1989	SWTH	14	26452
1761	1989	DOWO	2	26452
1762	1989	BTNW	2	26452
1765	1989	RWBL	25	26452
1767	1989	YBCH	1	26452
1768	1989	BRCR	6	26452
1771	1989	SOSP	39	26452
1772	1989	RCKI	136	26452
1774	1989	WIWA	11	26452
1775	1989	GCFL	12	26452
1778	1989	WTSP	408	26452
1779	1989	BGGN	3	26452
1780	1989	BRTH	3	26452
1781	1989	MAWA	55	26452
1782	1989	PRAW	6	26452
1785	1989	COYE	106	26452
1786	1989	AMRE	71	26452
1787	1989	RTHU	10	26452
1788	1989	EAWP	15	26452
1789	1989	BCCH	25	26452
1790	1989	MOWA	11	26452
1791	1989	BTBW	15	26452
1792	1989	TEWA	1	26452
1793	1989	BAWW	104	26452
1794	1989	MYWA	36	26452
1796	1990	BLJA	22	21539.9
1798	1990	EATO	25	21539.9
1799	1990	TRFL	39	21539.9
1800	1990	YEWA	32	21539.9
1801	1990	NOCA	18	21539.9
1802	1990	YPWA	1	21539.9
1803	1990	SCJU	2	21539.9
1804	1990	CAWA	25	21539.9
1805	1990	LEFL	20	21539.9
1806	1990	REVI	5	21539.9
1807	1990	VEER	19	21539.9
1808	1990	BAOR	31	21539.9
1809	1990	BHCO	2	21539.9
1810	1990	NOPA	3	21539.9
1814	1990	AMGO	25	21539.9
1815	1990	CARW	2	21539.9
1817	1990	EAPH	2	21539.9
1818	1990	MAWA	80	21539.9
1819	1990	CEDW	30	21539.9
1820	1990	GRCA	393	21539.9
1821	1990	HETH	45	21539.9
1822	1990	YSFL	8	21539.9
1823	1990	BHVI	2	21539.9
1824	1990	BAWW	45	21539.9
1825	1990	COGR	17	21539.9
1827	1990	SWTH	32	21539.9
1829	1990	GCFL	12	21539.9
1831	1990	WIWA	25	21539.9
1833	1990	LISP	4	21539.9
1835	1990	BGGN	2	21539.9
1836	1990	AMRO	32	21539.9
1837	1990	BLPW	12	21539.9
1838	1990	BRTH	6	21539.9
1839	1990	SOSP	15	21539.9
1840	1990	NOWA	25	21539.9
1842	1990	BRCR	9	21539.9
1843	1990	SWSP	16	21539.9
1844	1990	RWBL	18	21539.9
1845	1990	FISP	1	21539.9
1846	1990	EAWP	4	21539.9
1849	1990	BBWA	3	21539.9
1850	1990	NAWA	1	21539.9
1851	1990	TUTI	3	21539.9
1852	1990	OVEN	38	21539.9
1853	1990	GCKI	10	21539.9
1855	1990	WOTH	5	21539.9
1856	1990	RTHU	33	21539.9
1859	1990	RCKI	44	21539.9
1860	1990	BWWA	2	21539.9
1864	1990	WTSP	73	21539.9
1866	1990	AMRE	42	21539.9
1867	1990	BCCH	24	21539.9
1868	1990	COYE	86	21539.9
1869	1990	MYWA	7	21539.9
1870	1990	TEWA	1	21539.9
1871	1990	BTBW	12	21539.9
1872	1990	MOWA	17	21539.9
1873	1990	YBFL	21	21539.9
1877	1990	PRAW	5	21539.9
1878	1990	DOWO	3	21539.9
1879	1991	VEER	9	21799.9
1880	1991	CAWA	24	21799.9
1881	1991	NOPA	1	21799.9
1882	1991	CARW	5	21799.9
1883	1991	NOCA	8	21799.9
1884	1991	BLJA	86	21799.9
1885	1991	BHCO	2	21799.9
1886	1991	BHVI	2	21799.9
1888	1991	YPWA	4	21799.9
1889	1991	LEFL	6	21799.9
1890	1991	YEWA	6	21799.9
1891	1991	BRTH	6	21799.9
1892	1991	REVI	6	21799.9
1893	1991	AMRO	35	21799.9
1894	1991	YSFL	3	21799.9
1895	1991	EATO	12	21799.9
1897	1991	MAWA	64	21799.9
1898	1991	COGR	71	21799.9
1900	1991	TUTI	4	21799.9
1902	1991	SCJU	2	21799.9
1904	1991	BAOR	11	21799.9
1905	1991	BWWA	1	21799.9
1906	1991	AMGO	5	21799.9
1907	1991	BAWW	62	21799.9
1908	1991	SWSP	14	21799.9
1910	1991	BTNW	1	21799.9
1912	1991	RWBL	31	21799.9
1914	1991	WIWA	10	21799.9
1915	1991	BCCH	18	21799.9
1917	1991	HETH	29	21799.9
1918	1991	BLPW	26	21799.9
1919	1991	GRCA	239	21799.9
1920	1991	GCKI	10	21799.9
1922	1991	RCKI	10	21799.9
1923	1991	CEDW	3	21799.9
1924	1991	AMRE	66	21799.9
1926	1991	LISP	1	21799.9
1929	1991	BTBW	8	21799.9
1930	1991	EAPH	5	21799.9
1931	1991	BBWA	3	21799.9
1932	1991	SOSP	18	21799.9
1934	1991	PRAW	4	21799.9
1935	1991	NOWA	14	21799.9
1936	1991	TRFL	27	21799.9
1937	1991	YBCH	2	21799.9
1938	1991	BRCR	3	21799.9
1939	1991	EAWP	3	21799.9
1940	1991	COYE	78	21799.9
1941	1991	RTHU	17	21799.9
1943	1991	GCFL	3	21799.9
1944	1991	WTSP	133	21799.9
1945	1991	MYWA	1	21799.9
1946	1991	MOWA	8	21799.9
1947	1991	OVEN	20	21799.9
1948	1991	SWTH	12	21799.9
1949	1991	YBFL	13	21799.9
1950	1991	WOTH	4	21799.9
1951	1992	VEER	9	22639.6
1952	1992	WTSP	117	22639.6
1954	1992	COGR	81	22639.6
1957	1992	AMRO	37	22639.6
1958	1992	YPWA	1	22639.6
1959	1992	NOPA	6	22639.6
1963	1992	TUTI	79	22639.6
1966	1992	CAWA	35	22639.6
1967	1992	CARW	7	22639.6
1970	1992	LEFL	19	22639.6
1976	1992	BLJA	212	22639.6
1977	1992	BRCR	8	22639.6
1978	1992	BHVI	3	22639.6
1981	1992	REVI	12	22639.6
1982	1992	EAPH	7	22639.6
1983	1992	EAWP	3	22639.6
1984	1992	NOCA	16	22639.6
1985	1992	BHCO	11	22639.6
1986	1992	AMGO	19	22639.6
1988	1992	YEWA	25	22639.6
1989	1992	BAWW	57	22639.6
1990	1992	SOSP	23	22639.6
1992	1992	NOWA	24	22639.6
1993	1992	TRFL	35	22639.6
1994	1992	SWSP	35	22639.6
1995	1992	HETH	29	22639.6
1996	1992	RTHU	15	22639.6
1997	1992	FISP	1	22639.6
1998	1992	YSFL	3	22639.6
1999	1992	EATO	25	22639.6
2000	1992	BAOR	6	22639.6
2001	1992	GRCA	464	22639.6
2003	1992	WIWA	7	22639.6
2004	1992	MAWA	61	22639.6
2005	1992	RCKI	28	22639.6
2006	1992	GCKI	17	22639.6
2007	1992	BGGN	2	22639.6
2010	1992	BBWA	2	22639.6
2012	1992	LISP	10	22639.6
2014	1992	BLPW	31	22639.6
2015	1992	COYE	144	22639.6
2016	1992	BTBW	11	22639.6
2017	1992	BRTH	10	22639.6
2018	1992	GCFL	1	22639.6
2019	1992	BCCH	10	22639.6
2020	1992	CEDW	27	22639.6
2021	1992	AMRE	55	22639.6
2024	1992	OVEN	47	22639.6
2026	1992	TEWA	1	22639.6
2027	1992	SWTH	59	22639.6
2028	1992	DOWO	1	22639.6
2030	1992	MYWA	12	22639.6
2031	1992	YBFL	9	22639.6
2032	1992	WOTH	3	22639.6
2033	1992	RWBL	24	22639.6
2034	1992	MOWA	11	22639.6
2035	1992	PRAW	5	22639.6
2036	1993	CAWA	36	21608.2
2037	1993	NOPA	6	21608.2
2041	1993	YEWA	15	21608.2
2042	1993	YPWA	2	21608.2
2043	1993	GCKI	2	21608.2
2045	1993	COGR	18	21608.2
2046	1993	AMRO	39	21608.2
2047	1993	TUTI	5	21608.2
2048	1993	LEFL	12	21608.2
2049	1993	VEER	5	21608.2
2050	1993	WTSP	66	21608.2
2051	1993	RWBL	14	21608.2
2052	1993	SCJU	3	21608.2
2054	1993	CARW	4	21608.2
2056	1993	NOCA	12	21608.2
2057	1993	SOSP	13	21608.2
2059	1993	BLJA	16	21608.2
2060	1993	RCKI	18	21608.2
2062	1993	EAPH	6	21608.2
2063	1993	SWSP	19	21608.2
2071	1993	BRTH	8	21608.2
2073	1993	OVEN	13	21608.2
2074	1993	TRFL	65	21608.2
2076	1993	BTNW	1	21608.2
2077	1993	BGGN	2	21608.2
2078	1993	NAWA	3	21608.2
2079	1993	BHCO	5	21608.2
2080	1993	GRCA	336	21608.2
2081	1993	YSFL	3	21608.2
2082	1993	BAOR	11	21608.2
2083	1993	BLPW	15	21608.2
2085	1993	MAWA	100	21608.2
2086	1993	BAWW	30	21608.2
2087	1993	GCFL	3	21608.2
2088	1993	RTHU	10	21608.2
2089	1993	WIWA	20	21608.2
2091	1993	BCCH	5	21608.2
2092	1993	NOWA	20	21608.2
2093	1993	REVI	9	21608.2
2094	1993	CEDW	66	21608.2
2095	1993	EATO	27	21608.2
2097	1993	AMGO	24	21608.2
2098	1993	EAWP	9	21608.2
2099	1993	HETH	9	21608.2
2100	1993	BTBW	8	21608.2
2101	1993	BRCR	1	21608.2
2102	1993	BBWA	2	21608.2
2104	1993	SWTH	23	21608.2
2108	1993	LISP	4	21608.2
2109	1993	COYE	112	21608.2
2111	1993	TEWA	1	21608.2
2113	1993	MOWA	14	21608.2
2114	1993	PRAW	1	21608.2
2115	1993	DOWO	2	21608.2
2116	1993	MYWA	8	21608.2
2118	1993	AMRE	121	21608.2
2119	1993	WOTH	4	21608.2
2120	1993	YBFL	25	21608.2
2121	1994	CAWA	22	20208.6
2122	1994	VEER	4	20208.6
2124	1994	MAWA	33	20208.6
2127	1994	BRTH	12	20208.6
2128	1994	RWBL	25	20208.6
2130	1994	LEFL	7	20208.6
2131	1994	AMRO	37	20208.6
2134	1994	YPWA	1	20208.6
2136	1994	HETH	30	20208.6
2137	1994	BHCO	16	20208.6
2138	1994	BAOR	13	20208.6
2139	1994	CARW	9	20208.6
2140	1994	TUTI	4	20208.6
2141	1994	COGR	25	20208.6
2142	1994	SOSP	12	20208.6
2147	1994	BGGN	10	20208.6
2148	1994	RCKI	14	20208.6
2149	1994	NOPA	7	20208.6
2150	1994	WTSP	138	20208.6
2153	1994	BLJA	32	20208.6
2154	1994	GRCA	401	20208.6
2155	1994	YEWA	12	20208.6
2157	1994	SWTH	11	20208.6
2159	1994	NAWA	2	20208.6
2160	1994	EAPH	3	20208.6
2161	1994	YSFL	4	20208.6
2163	1994	BLPW	12	20208.6
2165	1994	CEDW	31	20208.6
2166	1994	OVEN	21	20208.6
2168	1994	NOCA	21	20208.6
2170	1994	GCFL	30	20208.6
2171	1994	WIWA	3	20208.6
2172	1994	EAWP	8	20208.6
2174	1994	GCKI	1	20208.6
2175	1994	SCJU	5	20208.6
2176	1994	BHVI	6	20208.6
2177	1994	COYE	86	20208.6
2178	1994	FISP	1	20208.6
2179	1994	BAWW	52	20208.6
2181	1994	BCCH	13	20208.6
2182	1994	BTBW	8	20208.6
2183	1994	TEWA	1	20208.6
2184	1994	RTHU	13	20208.6
2185	1994	NOWA	18	20208.6
2186	1994	REVI	4	20208.6
2187	1994	TRFL	41	20208.6
2189	1994	YBFL	7	20208.6
2190	1994	AMGO	23	20208.6
2193	1994	EATO	42	20208.6
2194	1994	AMRE	36	20208.6
2195	1994	LISP	3	20208.6
2197	1994	DOWO	3	20208.6
2198	1994	SWSP	26	20208.6
2199	1994	WOTH	9	20208.6
2200	1994	MOWA	12	20208.6
2201	1994	MYWA	18	20208.6
2203	1994	PRAW	4	20208.6
2204	1995	NAWA	1	20618.5
2206	1995	BLJA	32	20618.5
2207	1995	COYE	112	20618.5
2208	1995	LEFL	20	20618.5
2210	1995	SOSP	13	20618.5
2211	1995	YBCH	1	20618.5
2212	1995	YPWA	14	20618.5
2213	1995	BGGN	4	20618.5
2214	1995	EAPH	4	20618.5
2215	1995	HETH	38	20618.5
2216	1995	CAWA	38	20618.5
2219	1995	MAWA	51	20618.5
2220	1995	TUTI	6	20618.5
2222	1995	CEDW	13	20618.5
2223	1995	YEWA	10	20618.5
2224	1995	GRCA	301	20618.5
2227	1995	EAWP	13	20618.5
2228	1995	NOPA	3	20618.5
2229	1995	COGR	45	20618.5
2230	1995	CARW	6	20618.5
2231	1995	WTSP	223	20618.5
2232	1995	BRTH	6	20618.5
2234	1995	BAWW	34	20618.5
2235	1995	FISP	1	20618.5
2236	1995	GCFL	19	20618.5
2237	1995	WIWA	14	20618.5
2238	1995	SWTH	37	20618.5
2239	1995	PUFI	2	20618.5
2241	1995	VEER	30	20618.5
2242	1995	BAOR	62	20618.5
2243	1995	BHVI	4	20618.5
2245	1995	AMRO	41	20618.5
2246	1995	BHCO	12	20618.5
2249	1995	AMGO	27	20618.5
2250	1995	RCKI	35	20618.5
2251	1995	OVEN	30	20618.5
2252	1995	RTHU	22	20618.5
2253	1995	AMRE	53	20618.5
2254	1995	BCCH	16	20618.5
2256	1995	RWBL	16	20618.5
2257	1995	NOCA	21	20618.5
2260	1995	SWSP	21	20618.5
2262	1995	EATO	12	20618.5
2263	1995	BTBW	14	20618.5
2264	1995	MYWA	39	20618.5
2265	1995	WOTH	14	20618.5
2266	1995	DOWO	2	20618.5
2267	1995	YBFL	14	20618.5
2268	1995	BWWA	2	20618.5
2269	1995	YSFL	2	20618.5
2270	1995	BLPW	20	20618.5
2271	1995	SCJU	2	20618.5
2272	1995	TRFL	69	20618.5
2274	1995	REVI	19	20618.5
2277	1995	MOWA	30	20618.5
2280	1995	NOWA	39	20618.5
2281	1995	PRAW	2	20618.5
2282	1995	LISP	9	20618.5
2284	1996	BLJA	60	16666.6
2285	1996	BGGN	2	16666.6
2286	1996	YPWA	2	16666.6
2287	1996	MAWA	96	16666.6
2289	1996	WOTH	2	16666.6
2294	1996	COYE	94	16666.6
2295	1996	NAWA	2	16666.6
2298	1996	LEFL	9	16666.6
2299	1996	TUTI	20	16666.6
2300	1996	YEWA	6	16666.6
2301	1996	EAPH	7	16666.6
2302	1996	CEDW	6	16666.6
2303	1996	SOSP	10	16666.6
2304	1996	RCKI	12	16666.6
2306	1996	BBWA	2	16666.6
2307	1996	SWTH	38	16666.6
2309	1996	HETH	17	16666.6
2310	1996	NOPA	3	16666.6
2311	1996	COGR	18	16666.6
2312	1996	WTSP	109	16666.6
2313	1996	BRCR	5	16666.6
2317	1996	GRCA	444	16666.6
2318	1996	BTBW	17	16666.6
2319	1996	WIWA	8	16666.6
2320	1996	AMRE	54	16666.6
2321	1996	BCCH	9	16666.6
2322	1996	EAWP	3	16666.6
2323	1996	CARW	8	16666.6
2325	1996	RWBL	12	16666.6
2327	1996	AMRO	13	16666.6
2328	1996	EATO	23	16666.6
2329	1996	OVEN	23	16666.6
2330	1996	FISP	1	16666.6
2331	1996	MYWA	3	16666.6
2333	1996	YBFL	21	16666.6
2334	1996	RTHU	25	16666.6
2335	1996	BHCO	2	16666.6
2337	1996	SCJU	11	16666.6
2338	1996	BHVI	7	16666.6
2340	1996	BRTH	3	16666.6
2341	1996	SWSP	18	16666.6
2342	1996	GCKI	3	16666.6
2343	1996	PRAW	1	16666.6
2344	1996	GCFL	12	16666.6
2346	1996	MOWA	23	16666.6
2347	1996	BLPW	27	16666.6
2348	1996	BAOR	17	16666.6
2349	1996	DOWO	1	16666.6
2350	1996	BWWA	1	16666.6
2352	1996	AMGO	15	16666.6
2353	1996	NOCA	23	16666.6
2354	1996	NOWA	33	16666.6
2355	1996	YBCH	6	16666.6
2358	1996	BAWW	41	16666.6
2359	1996	REVI	10	16666.6
2360	1996	TRFL	33	16666.6
2364	1996	VEER	3	16666.6
2365	1996	CAWA	24	16666.6
2366	1996	YSFL	2	16666.6
2368	1996	LISP	12	16666.6
2370	1997	SWTH	12	15144.7
2371	1997	RCKI	7	15144.7
2372	1997	BGGN	9	15144.7
2373	1997	BLJA	24	15144.7
2375	1997	BRTH	7	15144.7
2377	1997	MYWA	5	15144.7
2378	1997	AMRE	39	15144.7
2379	1997	YPWA	1	15144.7
2380	1997	WIWA	12	15144.7
2381	1997	RWBL	11	15144.7
2382	1997	AMRO	17	15144.7
2384	1997	SOSP	13	15144.7
2385	1997	MAWA	81	15144.7
2387	1997	BAOR	13	15144.7
2388	1997	LEFL	7	15144.7
2389	1997	BTBW	16	15144.7
2390	1997	HETH	10	15144.7
2391	1997	BAWW	63	15144.7
2393	1997	TUTI	2	15144.7
2395	1997	CEDW	15	15144.7
2396	1997	COGR	11	15144.7
2399	1997	GRCA	249	15144.7
2401	1997	RTHU	16	15144.7
2402	1997	WOTH	5	15144.7
2403	1997	NAWA	6	15144.7
2404	1997	REVI	18	15144.7
2405	1997	CARW	6	15144.7
2407	1997	YEWA	8	15144.7
2410	1997	GCFL	10	15144.7
2411	1997	SWSP	22	15144.7
2412	1997	AMGO	20	15144.7
2413	1997	OVEN	54	15144.7
2415	1997	EAWP	4	15144.7
2416	1997	BTNW	2	15144.7
2417	1997	NOPA	4	15144.7
2419	1997	BHVI	2	15144.7
2420	1997	WTSP	83	15144.7
2421	1997	NOCA	17	15144.7
2427	1997	LISP	8	15144.7
2428	1997	BCCH	5	15144.7
2429	1997	MOWA	11	15144.7
2430	1997	BLPW	8	15144.7
2431	1997	EATO	14	15144.7
2432	1997	BHCO	1	15144.7
2434	1997	DOWO	2	15144.7
2435	1997	CAWA	19	15144.7
2436	1997	COYE	89	15144.7
2437	1997	YBFL	10	15144.7
2439	1997	PRAW	6	15144.7
2440	1997	VEER	10	15144.7
2441	1997	BWWA	2	15144.7
2443	1997	YSFL	1	15144.7
2444	1997	TRFL	19	15144.7
2445	1997	NOWA	25	15144.7
2447	1998	TUTI	15	17576.9
2448	1998	BRCR	1	17576.9
2449	1998	RWBL	3	17576.9
2450	1998	SOSP	13	17576.9
2451	1998	AMRO	13	17576.9
2452	1998	EAPH	4	17576.9
2453	1998	YEWA	16	17576.9
2454	1998	BWWA	1	17576.9
2455	1998	BRTH	3	17576.9
2456	1998	BLJA	49	17576.9
2457	1998	MAWA	126	17576.9
2458	1998	GRCA	312	17576.9
2461	1998	WOTH	2	17576.9
2462	1998	YSFL	4	17576.9
2463	1998	AMGO	12	17576.9
2464	1998	MYWA	6	17576.9
2467	1998	BHVI	3	17576.9
2469	1998	VEER	9	17576.9
2470	1998	LEFL	8	17576.9
2471	1998	BAWW	31	17576.9
2472	1998	SWTH	25	17576.9
2473	1998	AMRE	48	17576.9
2474	1998	OVEN	21	17576.9
2475	1998	NOCA	22	17576.9
2476	1998	BAOR	9	17576.9
2477	1998	NOPA	7	17576.9
2478	1998	WIWA	14	17576.9
2479	1998	RTHU	12	17576.9
2481	1998	GCFL	17	17576.9
2482	1998	CARW	6	17576.9
2483	1998	COGR	14	17576.9
2486	1998	BLPW	15	17576.9
2487	1998	SWSP	6	17576.9
2488	1998	EATO	23	17576.9
2489	1998	EAWP	1	17576.9
2490	1998	HETH	17	17576.9
2492	1998	CEDW	7	17576.9
2494	1998	CAWA	19	17576.9
2495	1998	WTSP	129	17576.9
2496	1998	BBWA	1	17576.9
2497	1998	BHCO	4	17576.9
2498	1998	YBFL	5	17576.9
2500	1998	BGGN	2	17576.9
2501	1998	YPWA	3	17576.9
2502	1998	LISP	4	17576.9
2503	1998	PRAW	3	17576.9
2504	1998	BTBW	7	17576.9
2505	1998	RCKI	10	17576.9
2507	1998	SCJU	2	17576.9
2508	1998	BCCH	18	17576.9
2509	1998	COYE	76	17576.9
2510	1998	MOWA	8	17576.9
2512	1998	TRFL	26	17576.9
2515	1998	BTNW	3	17576.9
2516	1998	NOWA	7	17576.9
2517	1998	REVI	7	17576.9
2518	1999	BLJA	19	22319.5
2519	1999	NOPA	1	22319.5
2521	1999	BRTH	4	22319.5
2522	1999	COYE	43	22319.5
2526	1999	CEDW	3	22319.5
2528	1999	RWBL	5	22319.5
2529	1999	YEWA	8	22319.5
2530	1999	TUTI	10	22319.5
2531	1999	BAOR	5	22319.5
2532	1999	AMRO	16	22319.5
2533	1999	BWWA	1	22319.5
2535	1999	GCFL	10	22319.5
2537	1999	LEFL	2	22319.5
2538	1999	BRCR	1	22319.5
2539	1999	MAWA	16	22319.5
2540	1999	BAWW	16	22319.5
2541	1999	VEER	2	22319.5
2544	1999	OVEN	12	22319.5
2545	1999	SWTH	2	22319.5
2546	1999	EAPH	7	22319.5
2548	1999	SCJU	3	22319.5
2549	1999	CAWA	4	22319.5
2550	1999	BBWA	1	22319.5
2551	1999	EATO	17	22319.5
2553	1999	YBCH	1	22319.5
2554	1999	CARW	6	22319.5
2558	1999	RCKI	27	22319.5
2560	1999	FISP	1	22319.5
2561	1999	WOTH	4	22319.5
2563	1999	SOSP	17	22319.5
2564	1999	NOWA	8	22319.5
2565	1999	BLPW	5	22319.5
2566	1999	WTSP	121	22319.5
2567	1999	COGR	18	22319.5
2568	1999	NOCA	23	22319.5
2569	1999	RTHU	15	22319.5
2570	1999	SWSP	23	22319.5
2571	1999	TRFL	17	22319.5
2572	1999	BTNW	1	22319.5
2573	1999	BHCO	3	22319.5
2574	1999	YPWA	2	22319.5
2577	1999	LISP	2	22319.5
2578	1999	MYWA	4	22319.5
2580	1999	BHVI	1	22319.5
2581	1999	BTBW	6	22319.5
2582	1999	GRCA	299	22319.5
2585	1999	BCCH	18	22319.5
2586	1999	BGGN	2	22319.5
2588	1999	YBFL	12	22319.5
2590	1999	DOWO	1	22319.5
2591	1999	AMRE	5	22319.5
2592	1999	YSFL	5	22319.5
2594	1999	WIWA	6	22319.5
2595	1999	HETH	29	22319.5
2596	1999	EAWP	3	22319.5
2597	1999	REVI	3	22319.5
2598	1999	AMGO	22	22319.5
2599	1999	MOWA	4	22319.5
2600	1999	NAWA	2	22319.5
2604	2000	COGR	20	17155.1
2605	2000	LEFL	12	17155.1
2606	2000	BHCO	3	17155.1
2607	2000	WTSP	302	17155.1
2608	2000	BRTH	6	17155.1
2609	2000	BHVI	7	17155.1
2610	2000	YEWA	15	17155.1
2612	2000	VEER	12	17155.1
2613	2000	RWBL	8	17155.1
2614	2000	GRCA	318	17155.1
2616	2000	GCFL	12	17155.1
2617	2000	BRCR	1	17155.1
2621	2000	COYE	74	17155.1
2622	2000	AMRO	26	17155.1
2625	2000	AMRE	25	17155.1
2627	2000	EAPH	4	17155.1
2628	2000	BAWW	39	17155.1
2629	2000	NAWA	6	17155.1
2630	2000	BAOR	10	17155.1
2631	2000	SWTH	23	17155.1
2632	2000	WOTH	3	17155.1
2633	2000	CEDW	7	17155.1
2634	2000	CARW	9	17155.1
2635	2000	NOCA	23	17155.1
2638	2000	NOWA	34	17155.1
2639	2000	OVEN	19	17155.1
2640	2000	CAWA	14	17155.1
2642	2000	YSFL	3	17155.1
2644	2000	NOPA	5	17155.1
2645	2000	RTHU	28	17155.1
2646	2000	BTNW	3	17155.1
2648	2000	TRFL	23	17155.1
2649	2000	MYWA	4	17155.1
2650	2000	BLPW	11	17155.1
2651	2000	BGGN	1	17155.1
2652	2000	SWSP	41	17155.1
2653	2000	GCKI	1	17155.1
2654	2000	SCJU	2	17155.1
2655	2000	EAWP	4	17155.1
2656	2000	LISP	5	17155.1
2657	2000	SOSP	19	17155.1
2658	2000	MAWA	64	17155.1
2661	2000	AMGO	22	17155.1
2663	2000	RCKI	19	17155.1
2664	2000	YPWA	4	17155.1
2665	2000	BTBW	9	17155.1
2666	2000	WIWA	18	17155.1
2667	2000	HETH	64	17155.1
2669	2000	EATO	8	17155.1
2670	2000	BLJA	33	17155.1
2672	2000	TUTI	12	17155.1
2674	2000	MOWA	6	17155.1
2675	2000	YBFL	6	17155.1
2676	2000	PRAW	3	17155.1
2677	2000	BCCH	20	17155.1
2679	2000	REVI	6	17155.1
2681	2001	BHVI	2	17841.2
2682	2001	BRTH	7	17841.2
2684	2001	GRCA	274	17841.2
2685	2001	RCKI	19	17841.2
2687	2001	BHCO	1	17841.2
2688	2001	AMRO	13	17841.2
2689	2001	BAWW	36	17841.2
2690	2001	YEWA	4	17841.2
2691	2001	MAWA	28	17841.2
2692	2001	COGR	15	17841.2
2693	2001	HETH	30	17841.2
2694	2001	VEER	3	17841.2
2695	2001	MYWA	9	17841.2
2696	2001	WTSP	258	17841.2
2697	2001	BLPW	17	17841.2
2699	2001	COYE	36	17841.2
2702	2001	NOWA	10	17841.2
2703	2001	NOCA	21	17841.2
2705	2001	BAOR	4	17841.2
2707	2001	GCFL	8	17841.2
2708	2001	WIWA	8	17841.2
2710	2001	CEDW	6	17841.2
2711	2001	PUFI	2	17841.2
2712	2001	LEFL	3	17841.2
2713	2001	WOTH	1	17841.2
2714	2001	YBFL	8	17841.2
2715	2001	REVI	7	17841.2
2717	2001	LISP	1	17841.2
2718	2001	BGGN	2	17841.2
2719	2001	YSFL	1	17841.2
2720	2001	NAWA	3	17841.2
2722	2001	AMRE	16	17841.2
2723	2001	BTNW	3	17841.2
2725	2001	BWWA	1	17841.2
2726	2001	TUTI	5	17841.2
2728	2001	SWSP	30	17841.2
2729	2001	TRFL	13	17841.2
2730	2001	NOPA	3	17841.2
2731	2001	YPWA	2	17841.2
2732	2001	CARW	5	17841.2
2733	2001	CAWA	5	17841.2
2734	2001	OVEN	13	17841.2
2735	2001	BLJA	20	17841.2
2737	2001	RTHU	2	17841.2
2739	2001	SOSP	15	17841.2
2740	2001	EAWP	1	17841.2
2741	2001	AMGO	28	17841.2
2742	2001	MOWA	9	17841.2
2743	2001	BTBW	6	17841.2
2744	2001	SWTH	5	17841.2
2745	2001	YBCH	1	17841.2
2746	2001	BCCH	15	17841.2
2747	2001	PRAW	1	17841.2
2748	2001	RWBL	14	17841.2
2749	2001	EATO	15	17841.2
2750	2002	AMRO	13	21043.3
2751	2002	BHCO	2	21043.3
2752	2002	NAWA	7	21043.3
2755	2002	BRTH	3	21043.3
2757	2002	BHVI	5	21043.3
2758	2002	BAWW	79	21043.3
2759	2002	BGGN	4	21043.3
2760	2002	VEER	11	21043.3
2762	2002	WTSP	202	21043.3
2764	2002	MAWA	148	21043.3
2765	2002	GCFL	7	21043.3
2766	2002	BAOR	5	21043.3
2767	2002	CEDW	11	21043.3
2769	2002	NOCA	17	21043.3
2772	2002	BRCR	5	21043.3
2774	2002	YEWA	10	21043.3
2775	2002	OVEN	51	21043.3
2776	2002	HETH	49	21043.3
2777	2002	LISP	13	21043.3
2779	2002	MYWA	23	21043.3
2780	2002	COYE	102	21043.3
2781	2002	BTNW	6	21043.3
2782	2002	WOTH	9	21043.3
2783	2002	BLPW	16	21043.3
2784	2002	TUTI	9	21043.3
2785	2002	NOWA	21	21043.3
2786	2002	BLJA	6	21043.3
2788	2002	CAWA	10	21043.3
2789	2002	EAPH	5	21043.3
2790	2002	RCKI	23	21043.3
2791	2002	TRFL	17	21043.3
2793	2002	AMRE	16	21043.3
2794	2002	SWTH	25	21043.3
2795	2002	NOPA	14	21043.3
2796	2002	SWSP	43	21043.3
2797	2002	CARW	6	21043.3
2798	2002	YPWA	18	21043.3
2799	2002	BCCH	12	21043.3
2800	2002	SOSP	12	21043.3
2802	2002	WIWA	9	21043.3
2804	2002	REVI	3	21043.3
2805	2002	YBFL	9	21043.3
2806	2002	GRCA	221	21043.3
2807	2002	BTBW	20	21043.3
2809	2002	GCKI	1	21043.3
2811	2002	EATO	14	21043.3
2812	2002	RWBL	5	21043.3
2813	2002	RTHU	22	21043.3
2814	2002	MOWA	8	21043.3
2816	2002	LEFL	3	21043.3
2818	2002	DOWO	4	21043.3
2819	2002	COGR	7	21043.3
2820	2002	YBCH	3	21043.3
2821	2002	AMGO	12	21043.3
2823	2002	EAWP	3	21043.3
2824	2003	NOCA	37	21453.3
2825	2003	BAWW	76	21453.3
2826	2003	MAWA	79	21453.3
2827	2003	BGGN	1	21453.3
2828	2003	BHCO	2	21453.3
2830	2003	CEDW	7	21453.3
2831	2003	HETH	29	21453.3
2833	2003	NAWA	13	21453.3
2834	2003	NOPA	10	21453.3
2835	2003	BTNW	6	21453.3
2837	2003	YEWA	9	21453.3
2838	2003	GCFL	6	21453.3
2839	2003	CARW	4	21453.3
2843	2003	YBCH	1	21453.3
2844	2003	WTSP	140	21453.3
2846	2003	NOWA	23	21453.3
2848	2003	LISP	11	21453.3
2849	2003	TRFL	37	21453.3
2850	2003	AMRO	10	21453.3
2851	2003	YSFL	1	21453.3
2852	2003	MOWA	3	21453.3
2853	2003	MYWA	3	21453.3
2854	2003	BLPW	20	21453.3
2855	2003	SCJU	4	21453.3
2857	2003	COYE	131	21453.3
2858	2003	EAPH	11	21453.3
2859	2003	VEER	10	21453.3
2860	2003	YBFL	6	21453.3
2861	2003	BRTH	2	21453.3
2862	2003	BCCH	4	21453.3
2863	2003	RTHU	24	21453.3
2865	2003	COGR	11	21453.3
2866	2003	TUTI	4	21453.3
2867	2003	BAOR	8	21453.3
2868	2003	SWTH	37	21453.3
2870	2003	CAWA	25	21453.3
2871	2003	RCKI	2	21453.3
2872	2003	BLJA	15	21453.3
2875	2003	AMRE	24	21453.3
2876	2003	BTBW	7	21453.3
2877	2003	SWSP	22	21453.3
2878	2003	DOWO	3	21453.3
2879	2003	LEFL	10	21453.3
2882	2003	WIWA	22	21453.3
2883	2003	OVEN	31	21453.3
2885	2003	YPWA	2	21453.3
2886	2003	GRCA	338	21453.3
2889	2003	EATO	19	21453.3
2890	2003	RWBL	6	21453.3
2891	2003	SOSP	16	21453.3
2892	2003	REVI	4	21453.3
2894	2003	EAWP	3	21453.3
2895	2003	WOTH	3	21453.3
2896	2003	AMGO	11	21453.3
2900	2003	PRAW	2	21453.3
2901	2004	BHCO	4	20372.7
2903	2004	BHVI	4	20372.7
2904	2004	BAWW	54	20372.7
2905	2004	HETH	18	20372.7
2906	2004	BWWA	1	20372.7
2907	2004	BGGN	3	20372.7
2908	2004	SWSP	41	20372.7
2909	2004	YEWA	32	20372.7
2910	2004	BCCH	1	20372.7
2911	2004	VEER	6	20372.7
2912	2004	NOPA	7	20372.7
2914	2004	CEDW	8	20372.7
2915	2004	OVEN	42	20372.7
2917	2004	AMRO	19	20372.7
2918	2004	PUFI	1	20372.7
2919	2004	AMRE	53	20372.7
2920	2004	CARW	6	20372.7
[truncated: 648 more rows]
